# Supplementary material for: Validation of PH and Varices Risk Scores for Prediction of High-Risk Esophageal Varix and Bleeding in Patients with B-Viral Cirrhosis
Source: MDPI journal article supplement (doi:10.3390/diagnostics12020441), 2022-02-09
Supplement: s1 [file s1]

**Supplementary Table S1.** The baseline clinical characteristics of the validation cohort ( $N = 222$ ).

| Variables                        | Values                |
|----------------------------------|-----------------------|
| Age, years                       | 61.1 $\pm$ 9.6        |
| Male                             | 149 (67.1)            |
| Presence of HEV                  | 59 (26.6)             |
| Child-Pugh class A/B             | 205 (92.3) / 17 (7.7) |
| Ascites                          | 31 (14.0)             |
| AST, U/L                         | 49.8 $\pm$ 70.2       |
| ALT, U/L                         | 40.8 $\pm$ 64.6       |
| Albumin, g/dL                    | 3.8 $\pm$ 0.7         |
| Total bilirubin, mg/dL           | 1.5 $\pm$ 2.4         |
| PT-INR                           | 1.1 $\pm$ 0.2         |
| Platelet count, $\times 10^9$ /L | 114.7 $\pm$ 61.3      |
| LS, kPa                          | 19.1 $\pm$ 16.7       |
| Spleen diameter, cm              | 11.9 $\pm$ 2.2        |
| LSPS                             | 3.3 $\pm$ 4.9         |
| PH risk score                    | 2.7 $\pm$ 4.9         |
| Varices risk score               | -2.5 $\pm$ 3.4        |

Values are expressed as mean  $\pm$  standard deviation or no. (%). **Abbreviations:** HEV, high-risk esophageal varix; AST, aspartate aminotransferase; ALT, alanine aminotransferase; PT, Prothrombin time; INR, international normalized ratio; LS, liver stiffness; LSPS, liver stiffness-spleen diameter to platelet ratio score.
